# Supplementary material for: An improved miniprotein host for fluorogenic supramolecular assembly on the surface of living cells
Source: Royal Society of Chemistry journal article supplement (doi:10.1039/c6ra01215a), 2016-01-01
Supplement: c6ra01215a1.pdf [file c6ra01215a1.pdf]

## Supplementary Information

### An improved miniprotein host for fluorogenic supramolecular assembly on the surface of living cells

Bi Xu, Xinqi Zhou, and Cliff I. Stains\*

Department of Chemistry, University of Nebraska-Lincoln, Lincoln, Nebraska 68588, United States

E-mail: cstains2@unl.edu

#### Table of Contents

|                                               |   |
|-----------------------------------------------|---|
| 1. Cloning .....                              | 2 |
| 2. Protein expression and purification .....  | 2 |
| 3. Circular dichroism (CD) spectrometry ..... | 2 |
| 4. EC <sub>50</sub> determination .....       | 2 |
| 5. Quantum yield determination.....           | 2 |
| 6. Molar absorptivity .....                   | 3 |
| 7. Job's plot .....                           | 3 |
| 8. Scatchard plot.....                        | 3 |
| 9. MBP-6.2.22 selectivity .....               | 3 |
| 10. Sedimentation velocity.....               | 3 |
| 11. Isothermal titration calorimetry .....    | 3 |
| 12. Microscopy .....                          | 4 |
| 13. Figures.....                              | 5 |
| Figure S1 .....                               | 5 |
| Figure S2.....                                | 6 |
| Figure S3.....                                | 7 |
| Figure S4.....                                | 8 |
| 14. References .....                          | 9 |

## 1. Cloning

The pCT-Fn3 vectors carrying wild-type Fn3 and 6.2.22 genes were extracted from yeast cells, as previously described.<sup>1</sup> The DNA sequence for 6.2.22 was PCR amplified using primers containing NdeI and HindIII restriction sites and then cloned into the pMAL-c5X-His vector (NEB).

Forward Primer: 5'-GCGCATATGGTTTCTGATGTTCCG-3'

Reverse Primer: 5'-GCGAAGCTTTTACTGGGATGGTTTGTC-3'

## 2. Protein expression and purification

pMAL-c5X-His-wtFn3, pMAL-c5X-His-6.2.18 and pMAL-c5X-His-6.2.22 were transformed into BL21-Gold (DE3) competent cells (Stratagene). Transformed cells were grown in 1L of Terrific Broth media (Research Products International Corp., T15000) with ampicillin and 0.2% (w/v) glucose at 37 °C to an OD<sub>600</sub> of ~0.5. Cells were then induced with 0.3 mM of IPTG at 16 °C overnight. After induction, cells were collected by centrifugation at 3000 g for 20 min. The resulting pellets were resuspended in 50 mL of cell lysis buffer (50 mM sodium phosphate (pH = 8.0), 0.5 M NaCl, 5% glycerol (v/v), 5 mM CHAPS and 1x complete EDTA-free protease inhibitor cocktail (Thermo Scientific, 1862209)) and sonicated at 40% amplitude using 1 sec on and 1 sec off cycles for 90 s. Lysates were centrifuged at 18,000 g for 40 min. The soluble fraction was incubated with pre-equilibrated amylose resin at 4 °C for 1 h. The resin was then washed with 50 mL of lysis buffer followed by 50 mL of 1x PBS buffer (137 mM NaCl, 2.7 mM KCl, 10.1 mM Na<sub>2</sub>HPO<sub>4</sub> and 1.8 mM KH<sub>2</sub>PO<sub>4</sub> (pH = 7.4)). Proteins were eluted with 5 mL of 1x PBS containing 10 mM maltose. Proteins were concentrated and further purified by a FPLC (AKTApriimePlus, GE Healthcare) with a HiLoad 16/600 Superdex 200pg column (GE Healthcare)). Protein absorbance was monitored at 280 nm.

Protein concentrations were determined by absorbance at 280 nm (MBP-wtFn3 molar extinction coefficient = 80,790 M<sup>-1</sup>cm<sup>-1</sup>; MBP-6.2.18 molar extinction coefficient = 86,750 M<sup>-1</sup>cm<sup>-1</sup>; MBP-6.2.22 molar extinction coefficient = 90,760 M<sup>-1</sup>cm<sup>-1</sup>).

## 3. Circular dichroism (CD) spectrometry

MBP-6.2.22 or MBP-wtFn3 (2 μM in 10 mM sodium phosphate, 300 μL) was added to a 0.1 cm quartz cuvette and scanned from 190 nm to 260 nm at 20 nm/min with an interval of 1 nm and a data integration time of 2 seconds, using a Jasco J-815 CD Spectrometer.

## 4. EC<sub>50</sub> determination

The EC<sub>50</sub> was determined by measuring the fluorescence change of 500 nM si-Pht in the presence of different concentrations of MBP-6.2.22 (from 30 nM to 60 μM) in a 384-well plate (Corning, black with 0.2 mm glass bottom) using a plate-reader (BioTek SynergyH1 hybrid reader). In each well, 30 μL of MBP-6.2.22 solution (in 1x PBS) was incubated with 500 nM si-Pht at room temperature for 30 min. In the background well, 30 μL of 500 nM si-Pht in 1x PBS was incubated at room temperature for 30 min. Each sample was prepared in triplicate. Fluorescence from each sample was measured in a plate-reader with the excitation wavelength at 575 nm. Arbitrary fluorescence of each well at 619 nm was background subtracted using the si-Pht only sample and plotted against the log of the concentration of MBP-6.2.22. The EC<sub>50</sub> was determined by fitting the resulting data to a four-parameter logistic function in KaleidaGraph.

## 5. Quantum yield determination

The quantum yield (QY) value was determined using a Fluoromax-4 Spectrofluorometer (HORIBA Scientific) with a 1 cm quartz cuvette. Sulforhodamine 101 in ethanol was used as the standard.<sup>2</sup> si-Pht was added to 50  $\mu\text{M}$  MBP-6.2.22 in 1x PBS to give an absorbance of  $\sim 0.05$ . QY was calculated as reported.<sup>3</sup>

## 6. Molar absorptivity

Experiments were done using a BIOMATE 3S (Thermo Scientific) with a 1 cm quartz cuvette. For the MBP-6.2.22-si-Pht complex, si-Pht (500 nM) was added to MBP-6.2.22 (50  $\mu\text{M}$ ) in 1x PBS. The molar absorptivity was determined using Beer's Law.

## 7. Job's plot

MBP-6.2.22 was incubated with si-Pht in 30  $\mu\text{L}$  of 1x PBS in a 384-well plate at varying mole fractions for 30 min at room temperature. The total concentration of species (MBP-6.2.22 plus si-Pht) was kept at 10  $\mu\text{M}$ . Each sample was prepared in triplicate. Fluorescence was measured by a plate-reader using excitation at 575 nm. Fluorescence of each sample at 619 nm was plotted against the mole fraction of MBP-6.2.22.

## 8. Scatchard plot

The background subtracted emission/[MBP-6.2.22] from the  $\text{EC}_{50}$  assay was plotted against emission.

## 9. MBP-6.2.22 selectivity

**MBP-6.2.22 was diluted in 1x PBS to a concentration of 10  $\mu\text{M}$  and incubated with 500 nM of 4DMN,<sup>4-6</sup> NBD<sup>7,8</sup> or si-Pht in 40  $\mu\text{L}$  of 1x PBS in a 384-well plate at room temperature for 30 min. As controls, dyes alone (500 nM) in 40  $\mu\text{L}$  of 1x PBS were incubated at room temperature for 30 min. Samples were prepared in triplicate. 4DMN, NBD and si-Pht samples were excited at 460 nm, 485 nm and 575 nm, respectively. Fluorescence was measured using a plate-reader at the emission wavelength of 535 nm, 565 nm and 619 nm for 4DMN, NBD and si-Pht, respectively. Fluorescence of each protein-with-dye sample was normalized to the fluorescence of the corresponding dye-only sample. Experiments were performed in triplicate.**

## 10. Sedimentation velocity

**MBP-6.2.22 was diluted in 1x PBS to a concentration of 50  $\mu\text{M}$ . A blank sample (400  $\mu\text{L}$  of 1x PBS) was used as the reference for ultracentrifuge calibration. The protein only sample (400  $\mu\text{L}$  of 50  $\mu\text{M}$  MBP-6.2.22) or the protein with dye sample (400  $\mu\text{L}$  of 50  $\mu\text{M}$  MBP-6.2.22 plus 5  $\mu\text{M}$  si-Pht) were incubated at room temperature for 30 min and then loaded into ultracentrifuge cells for analysis. Experiments were performed at 35,000 g at 20  $^{\circ}\text{C}$ . The absorbance was set at 295 nm or 590 nm where indicated. Experiments were performed on a Beckman Coulter ProteomeLab XL-I Protein Characterization System with an An-50 Ti rotor.**

## 11. Isothermal titration calorimetry

**MBP-6.2.22 was diluted in 1x PBS to a final concentration of 80  $\mu\text{M}$ . si-Pht was dissolved in 1x PBS to a final concentration of 400  $\mu\text{M}$ . si-Pht was titrated into the cell containing protein (1.5 mL total volume of cell). A total of 50 injections were made at 25  $^{\circ}\text{C}$ . The volume of each injection was 5  $\mu\text{L}$ . The resulting data was fit using a one-site binding model in order to determine an  $\text{EC}_{50}$  for supramolecular complexation. ITC assays were carried out using a Microcal GE Healthcare VP-ITC.**

## 12. Microscopy

Wild-type Fn3, 6.2.18 and 6.2.22 were expressed on the yeast surface as described previously.<sup>1</sup> For each sample,  $10^7$  cells were washed with 1x PBSA (1x PBS with 0.1% (w/v) bovine serum albumin) and resuspended in 50  $\mu$ L of 1x PBSA. Cells were incubated with 0.5  $\mu$ L of mouse anti-c-myc (BioLegend) at room temperature for 20 min. The resulting cells were then washed with 1x PBSA and resuspended in 50  $\mu$ L 1x PBSA. A secondary goat, anti-mouse Alexa Fluor 488 conjugated antibody (Invitrogen) was added as a 1:100 dilution and incubated on ice for 15 min. Cells were again washed with 1x PBSA and incubated with 500 nM si-Pht in 50  $\mu$ L of 1x PBSA at room temperature for 30 min. The resulting cells were imaged under a confocal microscope for green and red fluorescence. Images were taken on a Nikon A1 LSCM on a Nikon ECLIPS 90i microscope. Software: NIS Element 4.20. Laser lines were: 488 nm (green); 561 nm (red). Emission filters: 500-550 nm (green); 570-620 nm (red). Images for the green and red channels were taken sequentially. Exposure time: 0.5 frame/sec.

### 13. Figures

#### Figure S1

MBP-wtFn3

MKIEEGKLVIIWINGDKGYNGLAIEVGGKFEKDTGIKVTVEHPDKLEEKFPQVAATGDGPDIIFWAHDRFGGYAQSGLLAEITPDKAFQDKLYPFTWDAVRYNGKLIAYPIAVEALSIIY  
Maltose Binding Protein (MBP)  
NKDLLPNPPKTWEEIPALDKELKAKGKSALMFNLQEPYFTWPLIAADGGYAFKYENGYDIKDVGVNAGAKAGLTFLVDLIIKKNHMNADTDYSIAEAAFNKGETAMTINGPWAWSNI  
DTSKVNYGVTVLPTFKGQPSKPFVGLSAGINAASPNKELAKEFLENYLLTDEGLEAVNKDKPLGAVALKSYEEELVKDPRIAAATMENAQKGEIMPNI PQMSAFWYAVRTAVINAASG  
RQTVDEALKDAQTNSSNNNNNNNNNLGIEGRISHM VSDVPRDLEVVAAATPTSLIISWDAPAVTVRYRITYGETGGNSPVQEFVPGSKSTATISGLKPGVDYTIITVYAVTGRGDS  
wtFn3  
PASSKPISINRTEIDKPSQ

MBP-6.2.18

MKIEEGKLVIIWINGDKGYNGLAIEVGGKFEKDTGIKVTVEHPDKLEEKFPQVAATGDGPDIIFWAHDRFGGYAQSGLLAEITPDKAFQDKLYPFTWDAVRYNGKLIAYPIAVEALSIIY  
Maltose Binding Protein (MBP)  
NKDLLPNPPKTWEEIPALDKELKAKGKSALMFNLQEPYFTWPLIAADGGYAFKYENGYDIKDVGVNAGAKAGLTFLVDLIIKKNHMNADTDYSIAEAAFNKGETAMTINGPWAWSNI  
DTSKVNYGVTVLPTFKGQPSKPFVGLSAGINAASPNKELAKEFLENYLLTDEGLEAVNKDKPLGAVALKSYEEELVKDPRIAAATMENAQKGEIMPNI PQMSAFWYAVRTAVINAASG  
RQTVDEALKDAQTNSSNNNNNNNNNLGIEGRISHM VSDVPRDLEVVAAATPTSLIISWYYPGVHYRITYGETGGNSPVQEFVPSVKTATISGLKPGVDYTIITVYAVTYGFGVS  
6.2.18  
SSRPISINRTEIDKPSQ

MBP-6.2.22

MKIEEGKLVIIWINGDKGYNGLAIEVGGKFEKDTGIKVTVEHPDKLEEKFPQVAATGDGPDIIFWAHDRFGGYAQSGLLAEITPDKAFQDKLYPFTWDAVRYNGKLIAYPIAVEALSIIY  
Maltose Binding Protein (MBP)  
NKDLLPNPPKTWEEIPALDKELKAKGKSALMFNLQEPYFTWPLIAADGGYAFKYENGYDIKDVGVNAGAKAGLTFLVDLIIKKNHMNADTDYSIAEAAFNKGETAMTINGPWAWSNI  
DTSKVNYGVTVLPTFKGQPSKPFVGLSAGINAASPNKELAKEFLENYLLTDEGLEAVNKDKPLGAVALKSYEEELVKDPRIAAATMENAQKGEIMPNI PQMSAFWYAVRTAVINAASG  
RQTVDEALKDAQTNSSNNNNNNNNNLGIEGRISHM VSDVPRDLEVVAAATPTSLIISWYYPGVHYRITYGETGGNSPVQEFVPGAWSTATISGLKPGVDYTIITVYAVTYHGFGVS  
6.2.22  
SSRPISINRTEIDKPSQ

Amino acid sequences for MBP-wtFn3, MBP-6.2.18 and MBP-6.2.22 constructs.

**Figure S2**

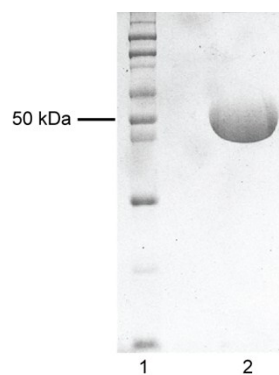

SDS-PAGE of purified MBP-6.2.22. Lane 1: protein ladder; Lane 2: MBP-6.2.22. MBP-6.2.22 calculated molecular weight = 53.8 kDa. The purification of MBP-wtFn3 and MBP-6.2.18 has been described previously.<sup>9</sup>

**Figure S3**

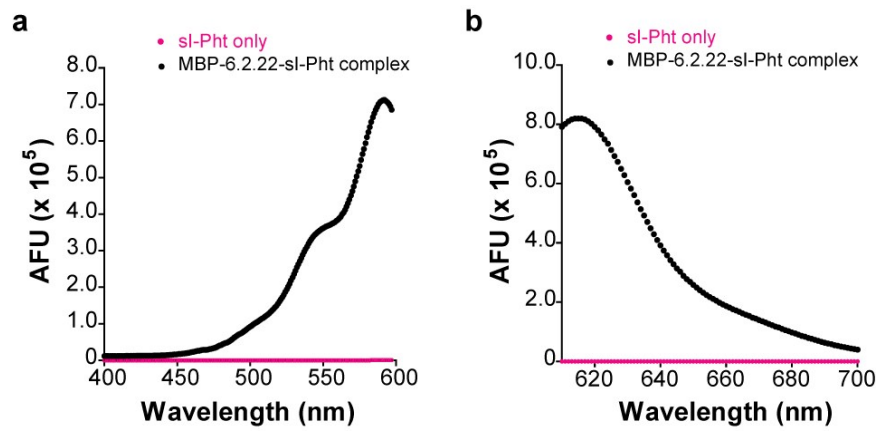

Excitation (a) and emission (b) spectra for si-Pht (500 nM) only versus si-Pht (500 nM) complexed with MBP-6.2.22 (50  $\mu$ M) in 1x PBS.

Figure S4

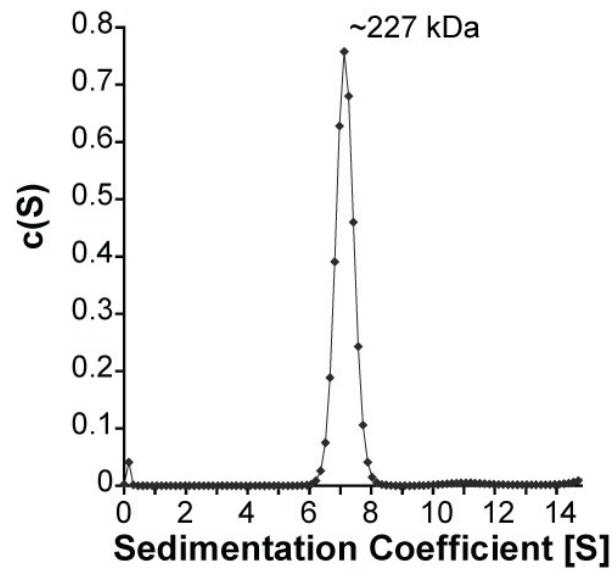

Sedimentation velocity data of MBP-6.2.22 (50  $\mu$ M) with si-Pht (5  $\mu$ M) monitored at 590 nm.



#### 14. References

- 1 T. F. Chen, S. de Picciotto, B. J. Hackel and K. D. Wittrup, *Methods Enzymol.*, 2013, **523**, 303-326.
- 2 C. J. MacNevin, D. Gremyachinskiy, C. W. Hsu, L. Li, M. Rougie, T. T. Davis and K. M. Hahn, *Bioconjugate Chem.*, 2013, **24**, 215-223.
- 3 S. Fery-Forgues and D. Lavabre, *J. Chem. Ed.*, 1999, **76**, 1260-1264.
- 4 J. Kollar, P. Hrdlovic, S. Chmela, M. Sarakha and G. Guyot, *J. Photoch. Photobio. A*, 2005, **170**, 151-159.
- 5 G. Loving and B. Imperiali, *J. Am. Chem. Soc.*, 2008, **130**, 13630-13638.
- 6 G. Loving and B. Imperiali, *Bioconjugate Chem.*, 2009, **20**, 2133-2141.
- 7 P. B. Ghosh and M. W. Whitehouse, *Biochem J.*, 1968, **108**, 155-156.
- 8 D. Lancet and I. Pecht, *Biochemistry*, 1977, **16**, 5150-5157.
- 9 B. Xu, X. Zhou and C. I. Stains, *J. Am. Chem. Soc.*, 2015, **137**, 14252-14255.
